# Supplementary material
Source: bioRxiv or medRxiv preprint supplement (https://medrxiv.org/highwire/filestream/85499/field_highwire_adjunct_files/0/2020.06.08.20125534-1.pdf)
Supplement: Supplementary file [file 2020.06.08.20125534-1.pdf]

## Supplemental Table 1: Details of all sequences used in this study

We gratefully acknowledge the authors, originating and submitting laboratories of the sequences from GISAID's EpiFlu™ Database on which this research is based. The list is detailed below. All submitters of data may be contacted directly via [www.gisaid.org](http://www.gisaid.org)

| Accession ID   | Virus name                  | Location                        | Collection date | Originating lab                                          | Submitting lab                                                                                                          | Authors                                                                                                                                                                                                                                          |
|----------------|-----------------------------|---------------------------------|-----------------|----------------------------------------------------------|-------------------------------------------------------------------------------------------------------------------------|--------------------------------------------------------------------------------------------------------------------------------------------------------------------------------------------------------------------------------------------------|
| EPI_ISL_408670 | hCoV-19/USA/WI1/2020        | North America / USA / Wisconsin | 2020-01-31      | Wisconsin Department of Health Services                  | Pathogen Discovery, Respiratory Viruses Branch, Division of Viral Diseases, Centers for Diseases Control and Prevention | Jing Zhang, Anna Uehara, Krista Queen, Yan Li, Ying Tao, Clinton R. Paden, Xiaoyan Lu, Brian Lynch, Senthil Kumar K. Sakhivel, Brett L. Whitaker, Shifaq Kamili, Lijuan Wang, Janna' R. Murray, Susan I. Gerber, Stephen Lindstrom, Suxiang Tong |
| EPI_ISL_414588 | hCoV-19/USA/MN1-MDH1/2020   | North America / USA / Minnesota | 2020-03-05      | Minnesota Department of Health, Public Health Laboratory | Minnesota Department of Health, Public Health Laboratory                                                                | Matt Plumb, Jake Garfin and Xiong Wang                                                                                                                                                                                                           |
| EPI_ISL_414589 | hCoV-19/USA/MN2-MDH2/2020   | North America / USA / Minnesota | 2020-03-07      | Minnesota Department of Health, Public Health Laboratory | Minnesota Department of Health, Public Health Laboratory                                                                | Matt Plumb, Jake Garfin and Xiong Wang                                                                                                                                                                                                           |
| EPI_ISL_414590 | hCoV-19/USA/MN3-MDH3/2020   | North America / USA / Minnesota | 2020-03-09      | Minnesota Department of Health, Public Health Laboratory | Minnesota Department of Health, Public Health Laboratory                                                                | Matt Plumb, Jake Garfin and Xiong Wang                                                                                                                                                                                                           |
| EPI_ISL_417189 | hCoV-19/USA/MN4-MDH4/2020   | North America / USA / Minnesota | 2020-03-09      | Minnesota Department of Health, Public Health Laboratory | Minnesota Department of Health, Public Health Laboratory                                                                | Matt Plumb, Jake Garfin and Xiong Wang                                                                                                                                                                                                           |
| EPI_ISL_417191 | hCoV-19/USA/MN5-MDH5/2020   | North America / USA / Minnesota | 2020-03-10      | Minnesota Department of Health, Public Health Laboratory | Minnesota Department of Health, Public Health Laboratory                                                                | Matt Plumb, Jake Garfin and Xiong Wang                                                                                                                                                                                                           |
| EPI_ISL_417192 | hCoV-19/USA/MN25-MDH25/2020 | North America / USA / Minnesota | 2020-03-12      | Minnesota Department of Health, Public Health Laboratory | Minnesota Department of Health, Public Health Laboratory                                                                | Matt Plumb, Jake Garfin and Xiong Wang                                                                                                                                                                                                           |
| EPI_ISL_417194 | hCoV-19/USA/MN26-MDH26/2020 | North America / USA / Minnesota | 2020-03-12      | Minnesota Department of Health, Public Health Laboratory | Minnesota Department of Health, Public Health Laboratory                                                                | Matt Plumb, Jake Garfin and Xiong Wang                                                                                                                                                                                                           |
| EPI_ISL_417196 | hCoV-19/USA/MN29-MDH29/2020 | North America / USA / Minnesota | 2020-03-11      | Minnesota Department of Health, Public Health Laboratory | Minnesota Department of Health, Public Health Laboratory                                                                | Matt Plumb, Jake Garfin and Xiong Wang                                                                                                                                                                                                           |
| EPI_ISL_417198 | hCoV-19/USA/MN30-MDH30/2020 | North America / USA / Minnesota | 2020-03-12      | Minnesota Department of Health, Public Health Laboratory | Minnesota Department of Health, Public Health Laboratory                                                                | Matt Plumb, Jake Garfin and Xiong Wang                                                                                                                                                                                                           |
| EPI_ISL_417469 | hCoV-19/USA/MN31-MDH31/2020 | North America / USA / Minnesota | 2020-03-12      | Minnesota Department of Health, Public Health Laboratory | Minnesota Department of Health, Public Health Laboratory                                                                | Matt Plumb, Jake Garfin and Xiong Wang                                                                                                                                                                                                           |
| EPI_ISL_417470 | hCoV-19/USA/MN32-MDH32/2020 | North America / USA / Minnesota | 2020-03-12      | Minnesota Department of Health, Public Health Laboratory | Minnesota Department of Health, Public Health Laboratory                                                                | Matt Plumb, Jake Garfin and Xiong Wang                                                                                                                                                                                                           |
| EPI_ISL_417471 | hCoV-19/USA/MN34-MDH34/2020 | North America / USA / Minnesota | 2020-03-12      | Minnesota Department of Health, Public Health Laboratory | Minnesota Department of Health, Public Health Laboratory                                                                | Matt Plumb, Jake Garfin and Xiong Wang                                                                                                                                                                                                           |
| EPI_ISL_417472 | hCoV-19/USA/MN35-MDH35/2020 | North America / USA / Minnesota | 2020-03-12      | Minnesota Department of Health, Public Health Laboratory | Minnesota Department of Health, Public Health Laboratory                                                                | Matt Plumb, Jake Garfin and Xiong Wang                                                                                                                                                                                                           |
| EPI_ISL_417473 | hCoV-19/USA/MN36-MDH36/2020 | North America / USA / Minnesota | 2020-03-13      | Minnesota Department of Health, Public Health Laboratory | Minnesota Department of Health, Public Health Laboratory                                                                | Matt Plumb, Jake Garfin and Xiong Wang                                                                                                                                                                                                           |
| EPI_ISL_417474 | hCoV-19/USA/MN38-MDH38/2020 | North America / USA / Minnesota | 2020-03-12      | Minnesota Department of Health, Public Health Laboratory | Minnesota Department of Health, Public Health Laboratory                                                                | Matt Plumb, Jake Garfin and Xiong Wang                                                                                                                                                                                                           |
| EPI_ISL_417475 | hCoV-19/USA/MN39-MDH39/2020 | North America / USA / Minnesota | 2020-03-12      | Minnesota Department of Health, Public Health Laboratory | Minnesota Department of Health, Public Health Laboratory                                                                | Matt Plumb, Jake Garfin and Xiong Wang                                                                                                                                                                                                           |
| EPI_ISL_417476 | hCoV-19/USA/MN40-MDH40/2020 | North America / USA / Minnesota | 2020-03-12      | Minnesota Department of Health, Public Health Laboratory | Minnesota Department of Health, Public Health Laboratory                                                                | Matt Plumb, Jake Garfin and Xiong Wang                                                                                                                                                                                                           |
| EPI_ISL_417477 | hCoV-19/USA/MN41-MDH41/2020 | North America / USA / Minnesota | 2020-03-12      | Minnesota Department of Health, Public Health Laboratory | Minnesota Department of Health, Public Health Laboratory                                                                | Matt Plumb, Jake Garfin and Xiong Wang                                                                                                                                                                                                           |
| EPI_ISL_417478 | hCoV-19/USA/MN42-MDH42/2020 | North America / USA / Minnesota | 2020-03-13      | Minnesota Department of Health, Public Health Laboratory | Minnesota Department of Health, Public Health Laboratory                                                                | Matt Plumb, Jake Garfin and Xiong Wang                                                                                                                                                                                                           |
| EPI_ISL_417479 | hCoV-19/USA/MN43-MDH43/2020 | North America / USA / Minnesota | 2020-03-12      | Minnesota Department of Health, Public Health Laboratory | Minnesota Department of Health, Public Health Laboratory                                                                | Matt Plumb, Jake Garfin and Xiong Wang                                                                                                                                                                                                           |
| EPI_ISL_417480 | hCoV-19/USA/MN44-MDH44/2020 | North America / USA / Minnesota | 2020-03-12      | Minnesota Department of Health, Public Health Laboratory | Minnesota Department of Health, Public Health Laboratory                                                                | Matt Plumb, Jake Garfin and Xiong Wang                                                                                                                                                                                                           |
| EPI_ISL_417492 | hCoV-19/USA/MN45-MDH45/2020 | North America / USA / Minnesota | 2020-03-13      | Minnesota Department of Health, Public Health Laboratory | Minnesota Department of Health, Public Health Laboratory                                                                | Matt Plumb, Jake Garfin and Xiong Wang                                                                                                                                                                                                           |
| EPI_ISL_417493 | hCoV-19/USA/MN46-MDH46/2020 | North America / USA / Minnesota | 2020-03-13      | Minnesota Department of Health, Public Health Laboratory | Minnesota Department of Health, Public Health Laboratory                                                                | Matt Plumb, Jake Garfin and Xiong Wang                                                                                                                                                                                                           |
| EPI_ISL_417494 | hCoV-19/USA/MN47-MDH47/2020 | North America / USA / Minnesota | 2020-03-13      | Minnesota Department of Health, Public Health Laboratory | Minnesota Department of Health, Public Health Laboratory                                                                | Matt Plumb, Jake Garfin and Xiong Wang                                                                                                                                                                                                           |
| EPI_ISL_417495 | hCoV-19/USA/MN48-MDH48/2020 | North America / USA / Minnesota | 2020-03-13      | Minnesota Department of Health, Public Health Laboratory | Minnesota Department of Health, Public Health Laboratory                                                                | Matt Plumb, Jake Garfin and Xiong Wang                                                                                                                                                                                                           |
| EPI_ISL_417496 | hCoV-19/USA/MN51-MDH51/2020 | North America / USA / Minnesota | 2020-03-13      | Minnesota Department of Health, Public Health Laboratory | Minnesota Department of Health, Public Health Laboratory                                                                | Matt Plumb, Jake Garfin and Xiong Wang                                                                                                                                                                                                           |
| EPI_ISL_417497 | hCoV-19/USA/MN52-MDH52/2020 | North America / USA / Minnesota | 2020-03-13      | Minnesota Department of Health, Public Health Laboratory | Minnesota Department of Health, Public Health Laboratory                                                                | Matt Plumb, Jake Garfin and Xiong Wang                                                                                                                                                                                                           |
| EPI_ISL_417498 | hCoV-19/USA/MN53-MDH53/2020 | North America / USA / Minnesota | 2020-03-13      | Minnesota Department of Health, Public Health Laboratory | Minnesota Department of Health, Public Health Laboratory                                                                | Matt Plumb, Jake Garfin and Xiong Wang                                                                                                                                                                                                           |
| EPI_ISL_417499 | hCoV-19/USA/MN55-MDH55/2020 | North America / USA / Minnesota | 2020-03-13      | Minnesota Department of Health, Public Health Laboratory | Minnesota Department of Health, Public Health Laboratory                                                                | Matt Plumb, Jake Garfin and Xiong Wang                                                                                                                                                                                                           |
| EPI_ISL_417500 | hCoV-19/USA/MN56-MDH56/2020 | North America / USA / Minnesota | 2020-03-14      | Minnesota Department of Health, Public Health Laboratory | Minnesota Department of Health, Public Health Laboratory                                                                | Matt Plumb, Jake Garfin and Xiong Wang                                                                                                                                                                                                           |
| EPI_ISL_417501 | hCoV-19/USA/MN57-MDH57/2020 | North America / USA / Minnesota | 2020-03-14      | Minnesota Department of Health, Public Health Laboratory | Minnesota Department of Health, Public Health Laboratory                                                                | Matt Plumb, Jake Garfin and Xiong Wang                                                                                                                                                                                                           |
| EPI_ISL_417502 | hCoV-19/USA/MN58-MDH58/2020 | North America / USA / Minnesota | 2020-03-14      | Minnesota Department of Health, Public Health Laboratory | Minnesota Department of Health, Public Health Laboratory                                                                | Matt Plumb, Jake Garfin and Xiong Wang                                                                                                                                                                                                           |
| EPI_ISL_417503 | hCoV-19/USA/MN59-MDH59/2020 | North America / USA / Minnesota | 2020-03-14      | Minnesota Department of Health, Public Health Laboratory | Minnesota Department of Health, Public Health Laboratory                                                                | Matt Plumb, Jake Garfin and Xiong Wang                                                                                                                                                                                                           |
| EPI_ISL_418028 | hCoV-19/USA/MN-UW243/2020   | North America / USA / Minnesota | 2020-03-13      | UW Virology Lab                                          | UW Virology Lab                                                                                                         | Pavitra Roychoudhury, Hong Xie, Keith Jerome, Alexander Greninger                                                                                                                                                                                |
| EPI_ISL_418036 | hCoV-19/USA/MN-UW251/2020   | North America / USA / Minnesota | 2020-03-13      | UW Virology Lab                                          | UW Virology Lab                                                                                                         | Pavitra Roychoudhury, Hong Xie, Keith Jerome, Alexander Greninger                                                                                                                                                                                |



|                |                                |                                                 |                                            |                                  |                                    |
|----------------|--------------------------------|-------------------------------------------------|--------------------------------------------|----------------------------------|------------------------------------|
| EPI_ISL_436893 | hCoV-19/USA/WI-GMF-01992/2020  | North America / USA / Wisconsin / Tr 2020-04-28 | Gundersen Molecular Diagnostics Laboratory | Kabara Cancer Research Institute | Craig S. Richmond, Paraic A. Kenny |
| EPI_ISL_436894 | hCoV-19/USA/WI-GMF-01993/2020  | North America / USA / Wisconsin / Ju 2020-04-28 | Gundersen Molecular Diagnostics Laboratory | Kabara Cancer Research Institute | Craig S. Richmond, Paraic A. Kenny |
| EPI_ISL_436895 | hCoV-19/USA/WI-GMF-01999/2020  | North America / USA / Wisconsin / Ju 2020-04-28 | Gundersen Molecular Diagnostics Laboratory | Kabara Cancer Research Institute | Craig S. Richmond, Paraic A. Kenny |
| EPI_ISL_436896 | hCoV-19/USA/WI-GMF-02263/2020  | North America / USA / Wisconsin / La 2020-05-02 | Gundersen Molecular Diagnostics Laboratory | Kabara Cancer Research Institute | Craig S. Richmond, Paraic A. Kenny |
| EPI_ISL_436897 | hCoV-19/USA/WI-GMF-02274/2020  | North America / USA / Wisconsin / Ve 2020-05-03 | Gundersen Molecular Diagnostics Laboratory | Kabara Cancer Research Institute | Craig S. Richmond, Paraic A. Kenny |
| EPI_ISL_436898 | hCoV-19/USA/WI-GMF-02294/2020  | North America / USA / Wisconsin / La 2020-05-03 | Gundersen Molecular Diagnostics Laboratory | Kabara Cancer Research Institute | Craig S. Richmond, Paraic A. Kenny |
| EPI_ISL_436899 | hCoV-19/USA/WI-GMF-02314/2020  | North America / USA / Wisconsin / La 2020-05-03 | Gundersen Molecular Diagnostics Laboratory | Kabara Cancer Research Institute | Craig S. Richmond, Paraic A. Kenny |
| EPI_ISL_436900 | hCoV-19/USA/WI-GMF-02381/2020  | North America / USA / Iowa / Fayette 2020-05-04 | Gundersen Molecular Diagnostics Laboratory | Kabara Cancer Research Institute | Craig S. Richmond, Paraic A. Kenny |
| EPI_ISL_455569 | hCoV-19/USA/WI-GMF-02728/2020  | North America / USA / Wisconsin / Gr 2020-05-08 | Gundersen Molecular Diagnostics Laboratory | Kabara Cancer Research Institute | Craig S. Richmond, Paraic A. Kenny |
| EPI_ISL_455571 | hCoV-19/USA/WI-GMF-03151/2020  | North America / USA / Wisconsin / Ve 2020-05-12 | Gundersen Molecular Diagnostics Laboratory | Kabara Cancer Research Institute | Craig S. Richmond, Paraic A. Kenny |
| EPI_ISL_455572 | hCoV-19/USA/WI-GMF-03156/2020  | North America / USA / Wisconsin / La 2020-05-12 | Gundersen Molecular Diagnostics Laboratory | Kabara Cancer Research Institute | Craig S. Richmond, Paraic A. Kenny |
| EPI_ISL_455573 | hCoV-19/USA/WI-GMF-M00001/2020 | North America / USA / Wisconsin / La 2020-05-10 | Gundersen Clinical Microbiology Laboratory | Kabara Cancer Research Institute | Craig S. Richmond, Paraic A. Kenny |
| EPI_ISL_455574 | hCoV-19/USA/WI-GMF-M00002/2020 | North America / USA / Wisconsin / Tr 2020-05-10 | Gundersen Clinical Microbiology Laboratory | Kabara Cancer Research Institute | Craig S. Richmond, Paraic A. Kenny |
| EPI_ISL_455575 | hCoV-19/USA/WI-GMF-03710/2020  | North America / USA / Wisconsin / Cr 2020-05-19 | Gundersen Molecular Diagnostics Laboratory | Kabara Cancer Research Institute | Craig S. Richmond, Paraic A. Kenny |
| EPI_ISL_455576 | hCoV-19/USA/WI-GMF-03823/2020  | North America / USA / Wisconsin / Tr 2020-05-19 | Gundersen Molecular Diagnostics Laboratory | Kabara Cancer Research Institute | Craig S. Richmond, Paraic A. Kenny |
| EPI_ISL_455578 | hCoV-19/USA/WI-GMF-04314/2020  | North America / USA / Wisconsin / Ve 2020-05-25 | Gundersen Molecular Diagnostics Laboratory | Kabara Cancer Research Institute | Craig S. Richmond, Paraic A. Kenny |
| EPI_ISL_455580 | hCoV-19/USA/WI-GMF-M00003/2020 | North America / USA / Wisconsin / La 2020-05-12 | Gundersen Clinical Microbiology Laboratory | Kabara Cancer Research Institute | Craig S. Richmond, Paraic A. Kenny |
| EPI_ISL_455581 | hCoV-19/USA/WI-GMF-M00004/2020 | North America / USA / Wisconsin / Ve 2020-05-24 | Gundersen Clinical Microbiology Laboratory | Kabara Cancer Research Institute | Craig S. Richmond, Paraic A. Kenny |
